# Supplementary material
Source: publisher figshare collection journal article supplement (https://acs.figshare.com/ndownloader/files/17664299)
Supplement: Supplementary file 1 [file 17664299]

Supplementary Information for

Mild Hydrothermal Synthesis of the Complex Hafnium Containing Fluorides  $\text{Cs}_2[\text{M}(\text{H}_2\text{O})_6][\text{Hf}_2\text{F}_{12}]$  (M= Ni, Co, and Zn),  $\text{CuHfF}_6(\text{H}_2\text{O})_4$  and  $\text{Cs}_2\text{Hf}_3\text{Mn}_3\text{F}_{20}$  Based on  $\text{HfF}_7$  and  $\text{HfF}_6$  Coordination Polyhedra

Gyanendra B. Ayer, Vladislav V. Klepov, Mark D. Smith, and Hans-Conrad zur Loye\*

Department of Chemistry and Biochemistry, University of South Carolina, 631 Sumter Street, Columbia, SC, United States

\*e-mail: [zurloye@mailbox.sc.edu](mailto:zurloye@mailbox.sc.edu)

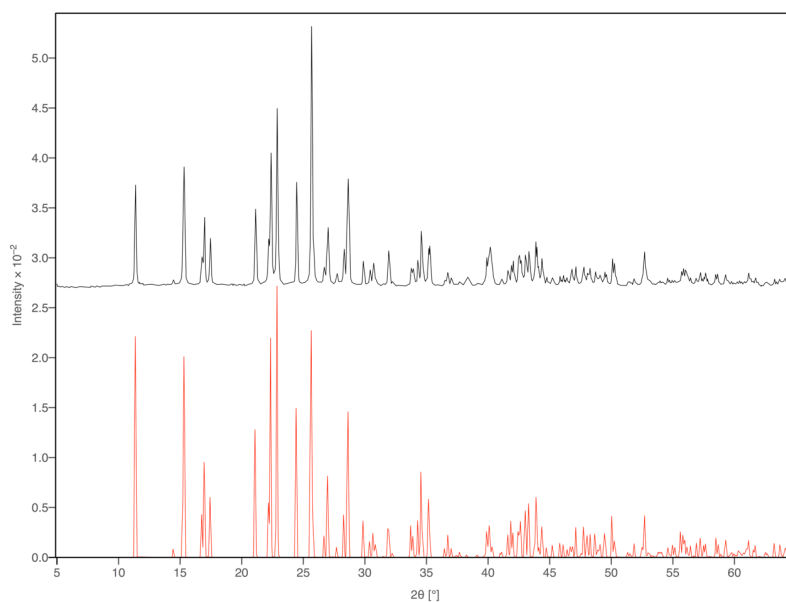

Figure S1. Experimental and calculated powder patterns of  $\text{Cs}_2[\text{Ni}(\text{H}_2\text{O})_6][\text{Hf}_2\text{F}_{12}]$  shown in black and red, respectively.

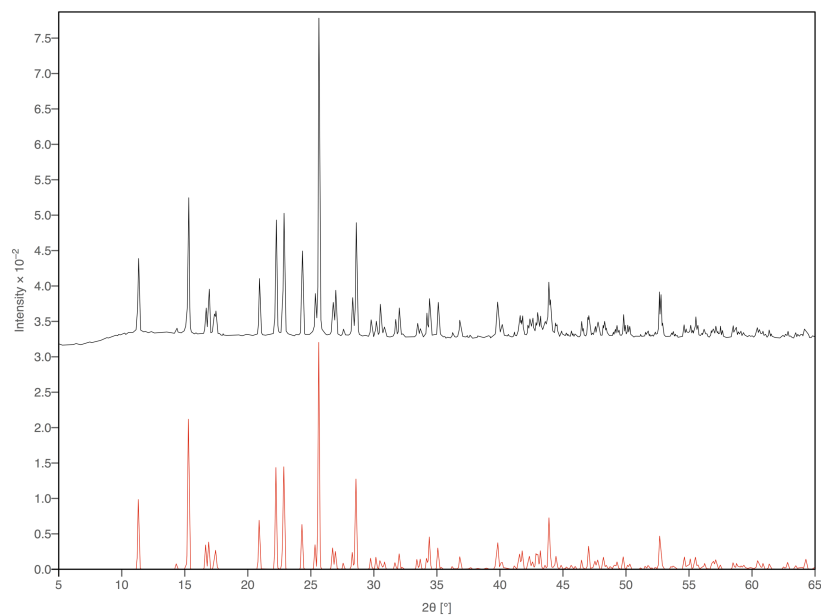

Figure S2. Experimental and calculated powder patterns of  $\text{Cs}_2[\text{Co}(\text{H}_2\text{O})_6][\text{Hf}_2\text{F}_{12}]$  shown in black and red, respectively.

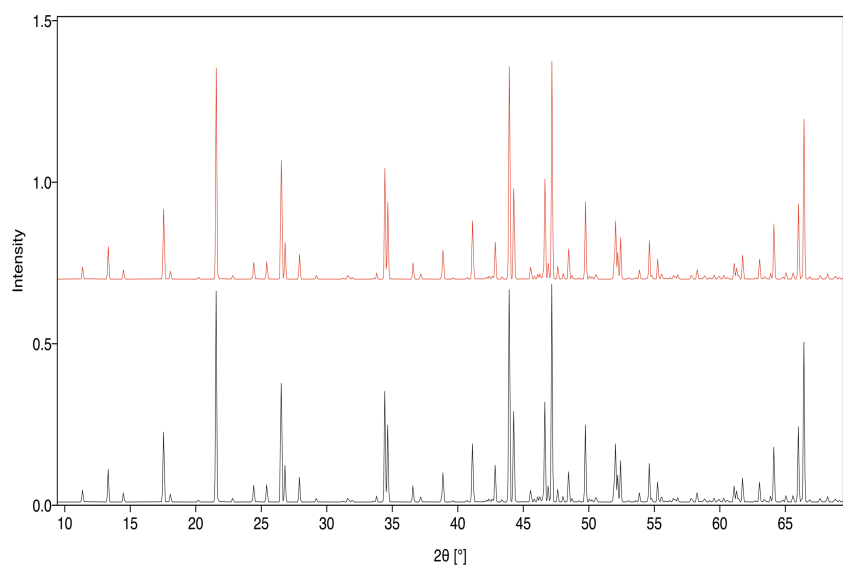

Figure S3. Experimental and calculated powder patterns of  $\text{Cs}_2\text{Hf}_3\text{Mn}_3\text{F}_{20}$  shown in black and red, respectively.

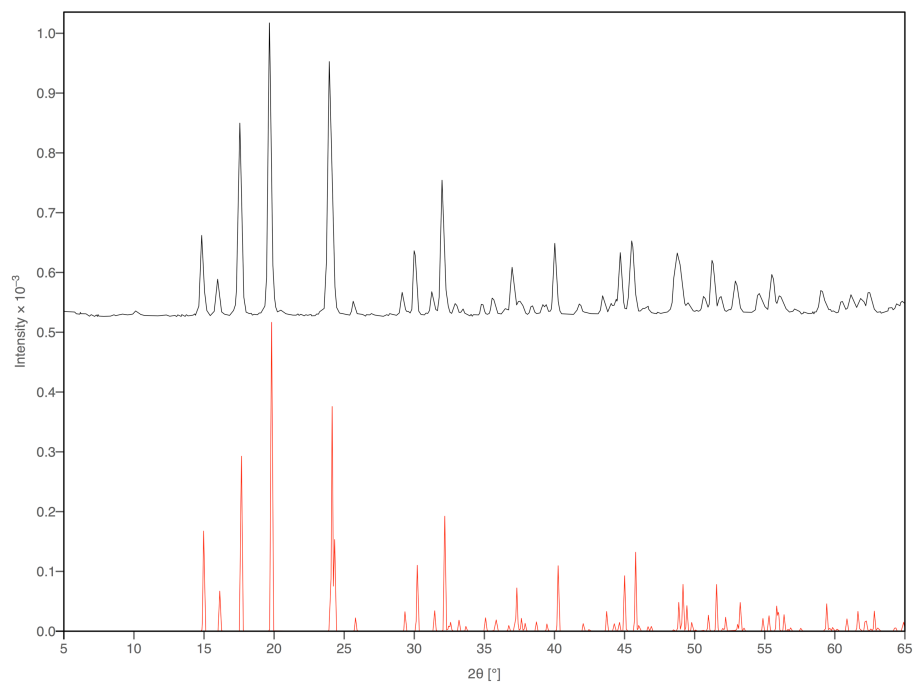

Figure S4. Experimental and calculated powder patterns of  $\text{CuHfF}_6(\text{H}_2\text{O})_4$  shown in black and red, respectively.

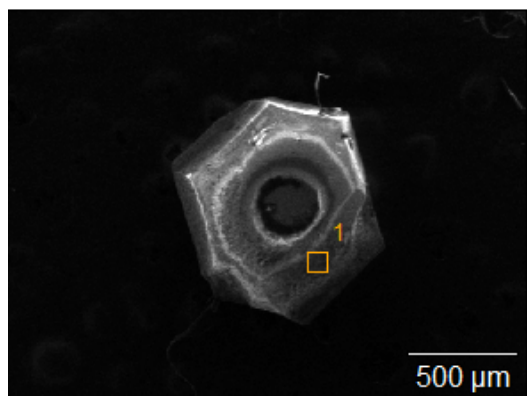

(a)

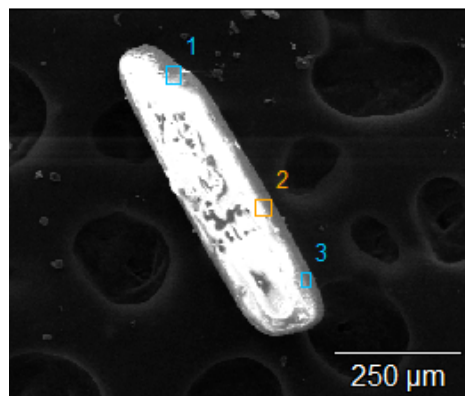

(b)

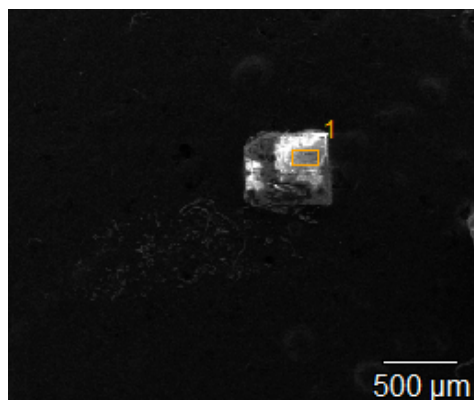

(c)

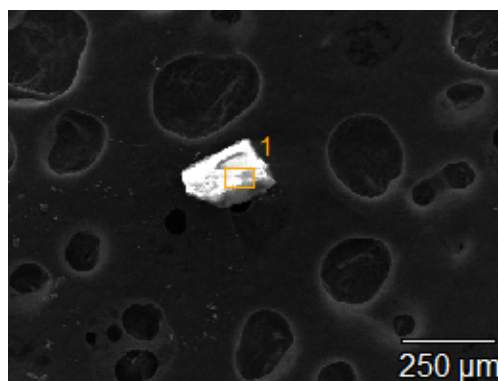

(d)

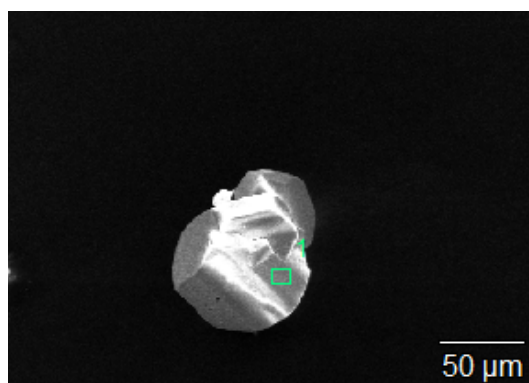

(e)

Figure S5. SEM images of crystals of  $\text{Cs}_2[\text{Ni}(\text{H}_2\text{O})_6][\text{Hf}_2\text{F}_{12}]$  (a),  $\text{Cs}_2[\text{Co}(\text{H}_2\text{O})_6][\text{Hf}_2\text{F}_{12}]$  (b),  $\text{Cs}_2[\text{Zn}(\text{H}_2\text{O})_6][\text{Hf}_2\text{F}_{12}]$  (c),  $\text{CuHfF}_6(\text{H}_2\text{O})_4$  (d), and  $\text{Cs}_2\text{Hf}_3\text{Mn}_3\text{F}_{20}$  (e).

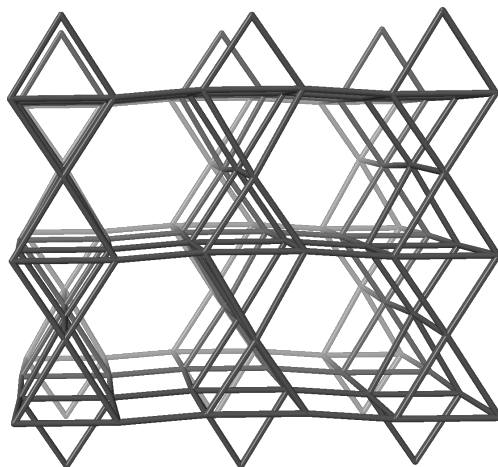

Figure S6. The simplified net of the  $\text{Cs}_2\text{Hf}_3\text{Mn}_3\text{F}_{20}$  framework exhibiting **btu** topology.

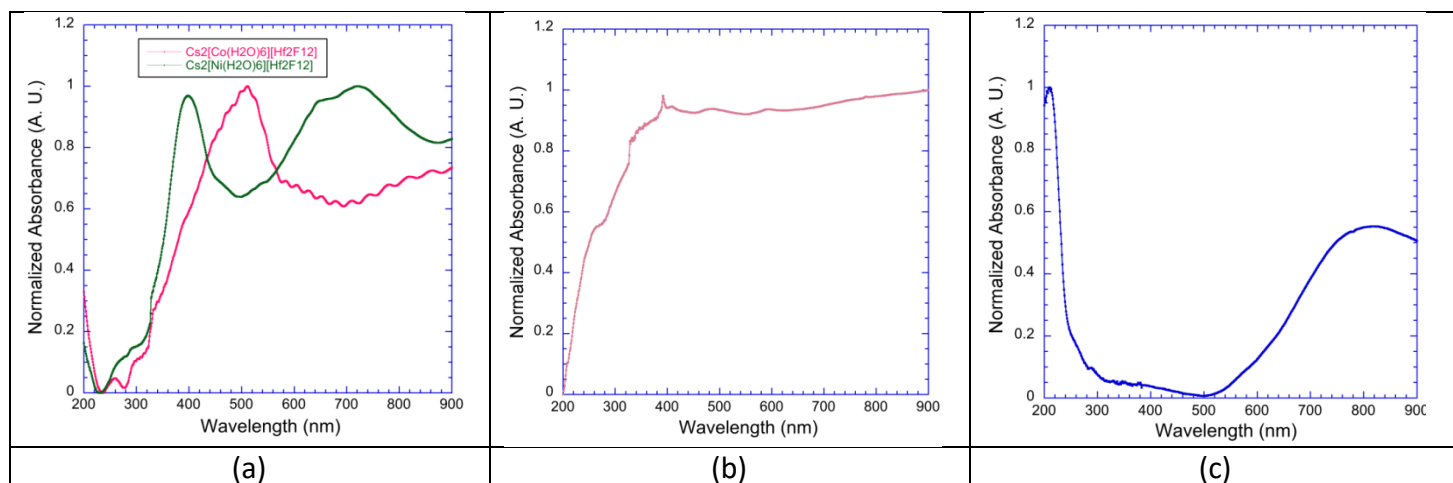

Figure S7. UV-Vis spectra of (a)  $\text{Cs}_2[\text{M}(\text{H}_2\text{O})_6][\text{Hf}_2\text{F}_{12}]$  ( $\text{M} = \text{Ni}$  and  $\text{Co}$ ) and (b)  $\text{Cs}_2\text{Hf}_3\text{Mn}_3\text{F}_{20}$  and (c)  $\text{CuHfF}_6(\text{H}_2\text{O})_4$ .

Table S1. Elemental composition determined by EDS

| <b>Cs<sub>2</sub>[Ni(H<sub>2</sub>O)<sub>6</sub>][Hf<sub>2</sub>F<sub>12</sub>]</b> |        | <b>Cs<sub>2</sub>[Co(H<sub>2</sub>O)<sub>6</sub>][Hf<sub>2</sub>F<sub>12</sub>]</b> |        | <b>Cs<sub>2</sub>[Zn(H<sub>2</sub>O)<sub>6</sub>][Hf<sub>2</sub>F<sub>12</sub>]</b> |        |
|-------------------------------------------------------------------------------------|--------|-------------------------------------------------------------------------------------|--------|-------------------------------------------------------------------------------------|--------|
| Element                                                                             | Atom % | Element                                                                             | Atom % | Element                                                                             | Atom % |
| Cs                                                                                  | 5.75   | Cs                                                                                  | 2.45   | Cs                                                                                  | 4.74   |
| Hf                                                                                  | 1.84   | Hf                                                                                  | 2.66   | Hf                                                                                  | 3.42   |
| Ni                                                                                  | 2.78   | Co                                                                                  | 1.13   | Zn                                                                                  | 1.21   |
| O                                                                                   | 14.58  | O                                                                                   | 15.57  | O                                                                                   | 24.45  |
| F                                                                                   | 75.06  | F                                                                                   | 78.19  | F                                                                                   | 66.18  |

| <b>CuHfF<sub>6</sub>(H<sub>2</sub>O)<sub>4</sub></b> |        | <b>Cs<sub>2</sub>Hf<sub>3</sub>Mn<sub>3</sub>F<sub>20</sub></b> |        |
|------------------------------------------------------|--------|-----------------------------------------------------------------|--------|
| Element                                              | Atom % | Element                                                         | Atom % |
| Cu                                                   | 3.18   | Cs                                                              | 8.22   |
| Hf                                                   | 2.31   | Hf                                                              | 13.24  |
| O                                                    | 27.81  | Mn                                                              | 14.37  |
| F                                                    | 66.69  | F                                                               | 64.17  |

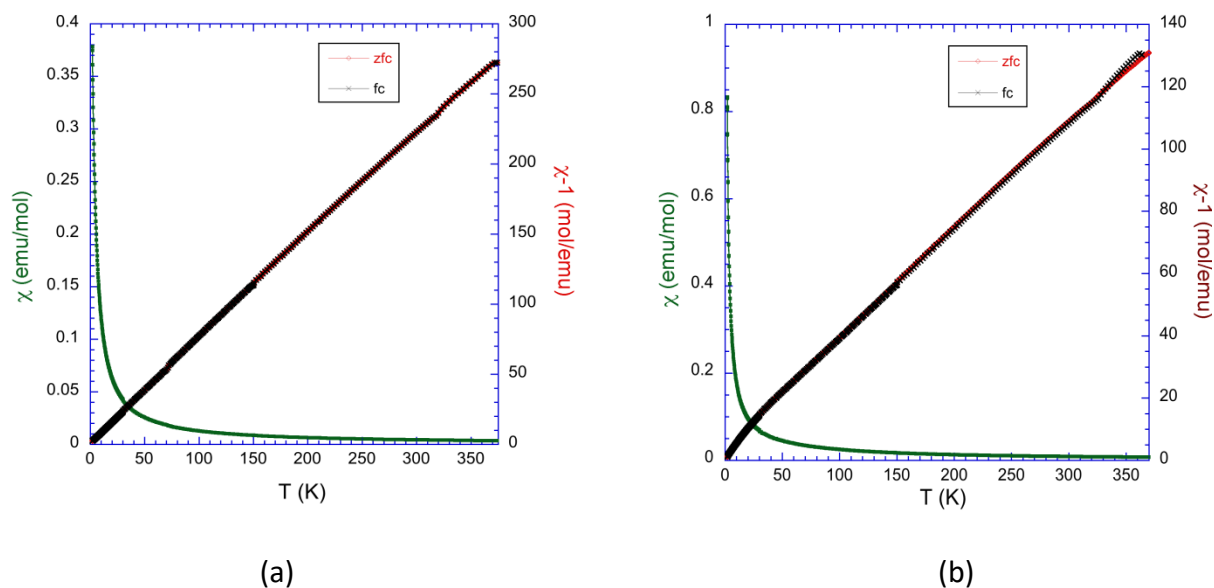

Figure S8. Overlapping zero-field and field cooled magnetic susceptibility curves of (a) Cs<sub>2</sub>[Ni(H<sub>2</sub>O)<sub>6</sub>][Hf<sub>2</sub>F<sub>12</sub>] and (b) Cs<sub>2</sub>[Co(H<sub>2</sub>O)<sub>6</sub>][Hf<sub>2</sub>F<sub>12</sub>]
